# Supplementary material for: Attitude confidence and source credibility in information foraging with social tags
Source: PLoS One. 2019 Jan 15;14(1):e0210423. doi: 10.1371/journal.pone.0210423 (PMC6333359; doi:10.1371/journal.pone.0210423)
Supplement: S2 Rawdata — (CSV) [file pone.0210423.s003.csv]

lfdn	external_lfdn	tester	dispcode	lastpage	quality	duration	OK	Einst_1	Einst_2	Einst_3	Einst_4	Einst_5	Einst_6	Einst_7	Einst_8	Einst_9	Einst_10	Einst_11	Einst_12	Einst_13	Einst_14	Einst_15	Einst_16	Einst_17	Einst_18	Einst_19	Einst_20	Einst_21	Einst_22	Einst_23	Einst_24	VWDep_1	VWDep_R1	VWDep_2	VWDep_R2	VWDep_3	VWDep_R3	VWDep_4	VWDep_R4	VWDep_5	VWDep_R5	VWDep_6	VWDep_R6	VWSchizo_1	VWSchizo_R1	VWSchizo_2	VWSchizo_R2	VWSchizo_3	VWSchizo_R3
16	0	0	31	36082	-77	3502	1	3	2	2	6	4	3	2	1	1	5	7	3	4	4	4	4	5	7	1	7	6	4	6	2	0	5	0	5	2	2	2	2	1	4	1	4	1	2	0	2	0	2
18	0	0	31	36082	-77	2673	1	3	2	1	5	4	3	3	1	4	3	5	4	5	2	5	5	4	6	5	5	5	4	5	2	0	3	1	2	0	3	2	1	1	2	1	3	2	2	1	1	1	3
19	0	0	31	36082	-77	3277	1	2	2	3	5	3	2	1	2	3	6	5	2	4	2	5	5	4	5	5	5	5	2	5	1	1	1	1	1	1	1	0	1	1	1	1	1	1	4	1	2	1	3
20	0	0	31	36082	-77	1284	1	1	3	2	3	4	2	1	1	4	2	3	6	2	1	5	4	1	2	2	2	4	1	3	1	1	2	1	1	2	2	2	1	1	1	1	1	2	2	1	2	1	2
21	0	0	31	36082	-77	5592	1	3	5	4	2	4	4	3	3	3	2	3	3	2	2	5	4	6	2	3	1	4	4	2	3	1	1	1	1	0	1	2	1	1	1	1	1	0	1	0	1	0	1
26	0	0	31	36082	-77	4659	1	6	6	5	6	6	2	3	2	2	7	6	5	5	5	7	6	7	7	4	7	2	6	2	6	1	2	1	2	2	3	2	2	1	2	1	2	0	3	1	2	1	2
27	0	0	31	36082	-77	2572	1	5	6	4	5	2	2	4	2	4	5	6	4	5	3	5	5	5	4	4	5	4	5	5	2	0	4	1	2	0	3	2	3	1	2	1	2	0	3	0	3	1	2
29	0	0	31	36082	-77	3629	1	6	6	5	5	6	4	2	5	4	6	6	5	5	3	6	5	6	6	4	6	5	6	5	2	1	2	1	1	2	2	2	2	1	1	0	4	1	4	1	2	1	2
32	0	0	31	36082	-77	1554	1	2	5	4	5	2	4	1	1	3	6	6	4	6	5	5	5	3	6	3	6	4	5	5	1	1	2	1	1	1	1	2	1	1	1	1	1	1	4	0	4	0	4
33	0	0	31	36082	-77	2330	1	3	4	4	6	6	4	1	1	1	4	7	3	6	2	7	7	7	7	3	5	5	7	7	1	1	1	1	2	2	2	0	3	1	2	1	1	0	3	1	2	1	2
34	0	0	31	36082	-77	3529	1	2	4	5	7	7	7	7	4	4	6	7	2	6	1	7	7	7	6	2	4	5	6	7	4	1	1	1	1	1	3	2	2	1	2	1	2	1	2	1	2	1	1
35	0	0	31	36082	-77	4141	1	3	6	5	7	5	4	3	7	5	6	7	3	6	2	7	7	7	7	5	7	6	6	5	2	1	1	1	1	2	2	2	4	1	2	1	1	2	2	1	2	0	2
38	0	0	31	36082	-77	2714	1	2	1	6	2	1	2	1	1	5	2	6	2	3	2	3	3	1	3	2	3	1	1	1	1	1	2	1	3	2	4	2	2	0	2	1	2	1	3	1	2	1	2
40	0	0	31	36082	-77	2526	1	1	4	3	6	1	1	1	1	4	5	6	4	6	1	5	5	7	5	3	6	2	6	6	1	0	1	1	1	1	2	0	3	1	2	1	1	0	3	0	2	1	2
44	0	0	31	36082	-77	2304	1	6	5	2	7	3	3	7	6	6	6	7	3	5	6	7	7	7	6	6	7	6	7	6	4	1	1	1	1	2	1	0	3	1	1	1	1	2	2	1	1	1	1
45	0	0	31	36082	-77	3989	1	2	2	4	5	6	4	1	5	1	7	7	2	5	7	7	6	4	5	1	5	3	5	4	2	1	1	1	1	1	4	2	1	1	2	1	1	1	3	1	1	1	1
46	0	0	31	36082	-77	2217	1	3	2	2	6	1	1	1	2	3	6	7	5	6	2	6	6	6	7	4	7	6	6	7	1	1	1	1	1	1	2	2	1	1	2	1	1	0	1	0	3	1	4
48	0	0	31	36082	-77	2889	1	4	3	3	6	3	2	1	1	6	6	6	3	4	1	2	6	5	7	6	5	6	3	6	6	0	4	1	2	0	4	2	3	0	3	1	2	0	3	1	4	1	2
51	0	0	31	36082	-77	2049	1	6	4	2	6	5	1	4	1	4	6	7	6	7	1	6	6	7	7	1	7	7	7	7	1	0	2	1	2	2	2	2	2	1	1	1	1	2	4	1	2	1	2
57	0	0	31	36082	-77	2514	1	3	4	4	6	3	3	2	4	4	7	7	4	5	4	5	5	5	7	2	7	5	2	5	1	0	4	1	2	1	4	2	3	1	2	1	2	0	4	0	4	0	4
58	0	0	31	36082	-77	2377	1	1	5	4	5	2	4	3	2	4	5	6	3	4	3	6	6	7	7	5	5	4	6	4	2	1	3	1	1	2	2	1	3	1	2	1	2	1	1	1	3	1	3
60	0	0	31	36082	-77	1694	1	5	3	3	6	2	1	1	1	4	5	7	5	6	4	3	5	4	6	5	5	6	4	6	1	1	2	1	2	2	2	2	2	0	3	1	4	2	2	0	2	0	3
61	0	0	31	36082	-77	2543	1	4	3	3	6	6	3	2	1	3	3	6	3	5	2	5	6	4	6	2	7	6	4	5	3	1	2	1	2	1	3	1	3	0	3	1	2	0	3	0	2	0	2
62	0	0	31	36082	-77	3345	1	3	1	4	5	3	1	1	1	4	4	6	2	5	1	4	4	2	6	3	5	4	1	6	4	1	2	1	1	2	3	1	2	1	2	1	2	1	2	1	2	1	2
66	0	0	32	36082	-77	-1	1	7	6	4	6	4	4	6	6	4	4	6	5	4	5	6	6	5	5	5	7	3	7	5	6	1	1	1	1	2	1	2	1	1	1	1	1	2	2	1	1	1	1
67	0	0	31	36082	-77	3460	1	5	4	5	6	7	4	7	1	2	4	6	3	4	1	6	6	6	6	4	5	4	5	4	5	1	1	1	1	1	2	0	3	0	3	1	2	0	4	1	2	1	2
69	0	0	31	36082	-77	2004	1	7	4	2	7	2	2	2	1	4	6	7	3	7	3	6	6	4	7	7	7	6	4	7	1	1	4	1	2	2	2	1	4	1	2	1	2	0	3	1	2	1	2
70	0	0	31	36082	-77	3712	1	6	3	2	6	5	3	1	3	3	6	7	3	5	6	6	6	5	7	6	7	5	5	6	5	0	4	1	1	2	1	2	1	1	1	1	1	2	1	1	1	1	1
71	0	0	31	36082	-77	2463	1	4	2	2	7	1	1	1	1	5	6	6	6	6	2	4	5	1	7	1	7	5	1	6	2	1	1	1	1	0	3	1	2	1	4	0	3	0	5	0	5	1	2
72	0	0	31	36082	-77	1438	1	3	2	5	7	2	1	1	4	3	6	7	4	6	7	7	6	4	6	2	7	4	3	4	2	1	1	1	1	1	3	0	4	1	1	1	1	1	2	1	3	1	2
73	0	0	31	36082	-77	2540	1	6	2	3	7	2	1	1	1	3	5	6	5	5	3	5	5	2	6	5	5	4	3	6	1	1	4	1	1	2	1	1	3	0	4	1	4	2	2	1	2	1	2
74	0	0	31	36082	-77	2811	1	6	2	1	5	5	1	1	1	6	6	6	3	5	5	5	5	3	5	5	5	6	2	6	1	1	2	1	2	0	4	2	2	1	2	1	2	0	3	1	3	1	2
[truncated: 240 more columns]
